# Supplementary material for: Mass spectrometric identification and toxicity assessment of degraded products of aflatoxin B1 and B2 by Corymbia citriodora aqueous extracts
Source: PubMed Central journal article supplement (PMC4589780; doi:10.1038/srep14672), 2015-10-01
Supplement: srep14672-s1.pdf [file srep14672-s1.pdf]

# Mass spectrometric identification and toxicity assessment of degraded products of aflatoxin B1 and B2 by *Corymbia citriodora* aqueous extracts

Wajiha Iram <sup>a</sup>, Tehmina Anjum <sup>a\*</sup>, Mazhar Iqbal <sup>b</sup>, Abdul Ghaffar <sup>c</sup>, Mateen Abbas <sup>d</sup>

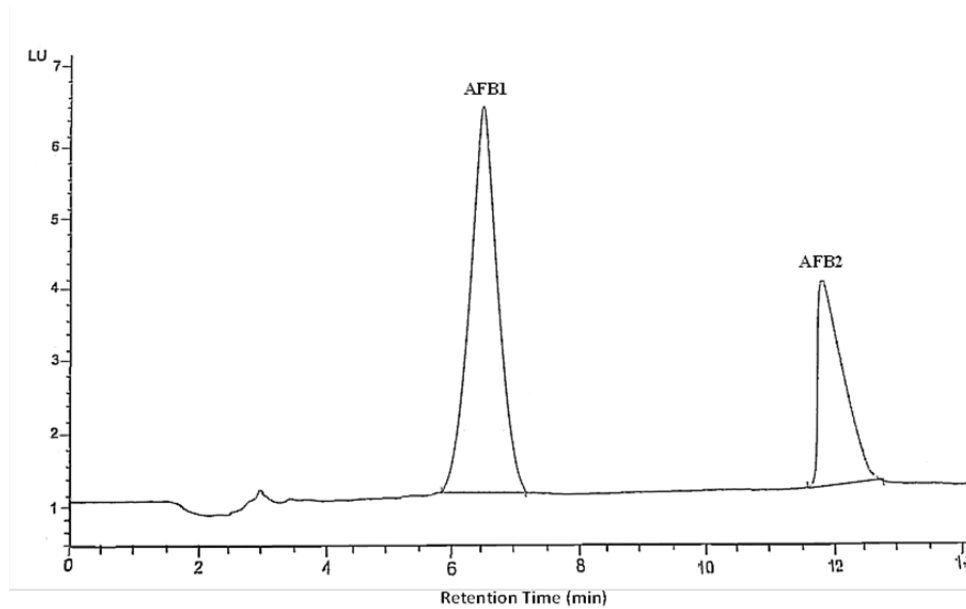

**Supplementary Figure 1** HPLC chromatogram of untreated AFB1 and AFB2 with retention time of 6.46 and 12.63 min respectively.

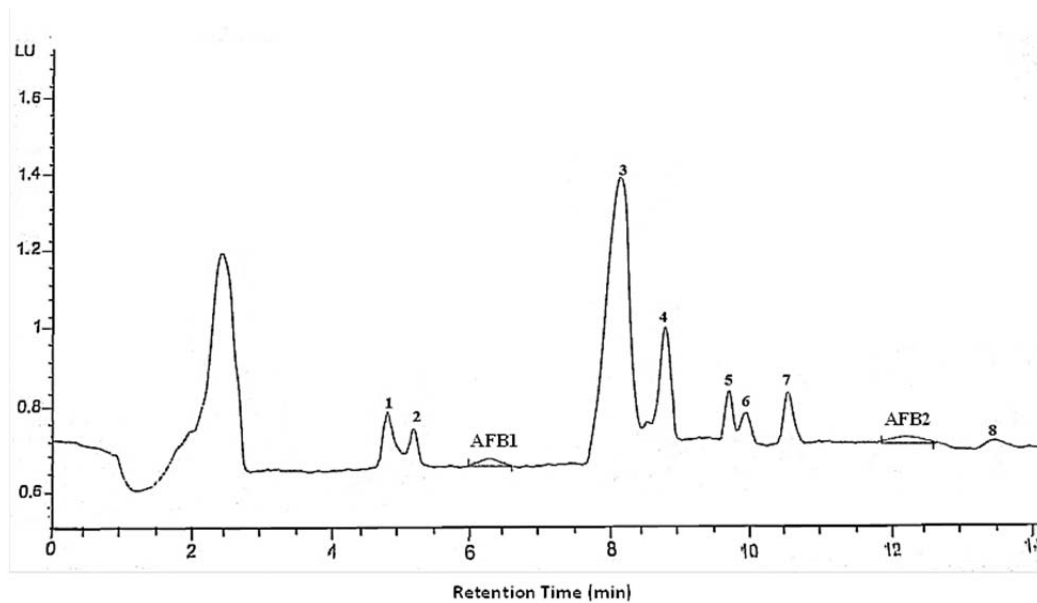

**Supplementary Figure 2** HPLC chromatogram of AFB1 and AFB2 after treatment with aqueous extract of *Corymbia citriodora* leaves under optimized conditions (*In Vivo*). Peaks denoted by numbers appeared after treatment whose footprint was not found in untreated AFB1 and AFB2 chromatogram.
